# Supplementary material for: Systematic permutation testing in GWAS pathway analyses: identification of genetic networks in dilated cardiomyopathy and ulcerative colitis
Source: PubMed Central journal article supplement (PMC4223581; doi:10.1186/1471-2164-15-622), 2014-07-22

Figure S2

Significant just in original p-values

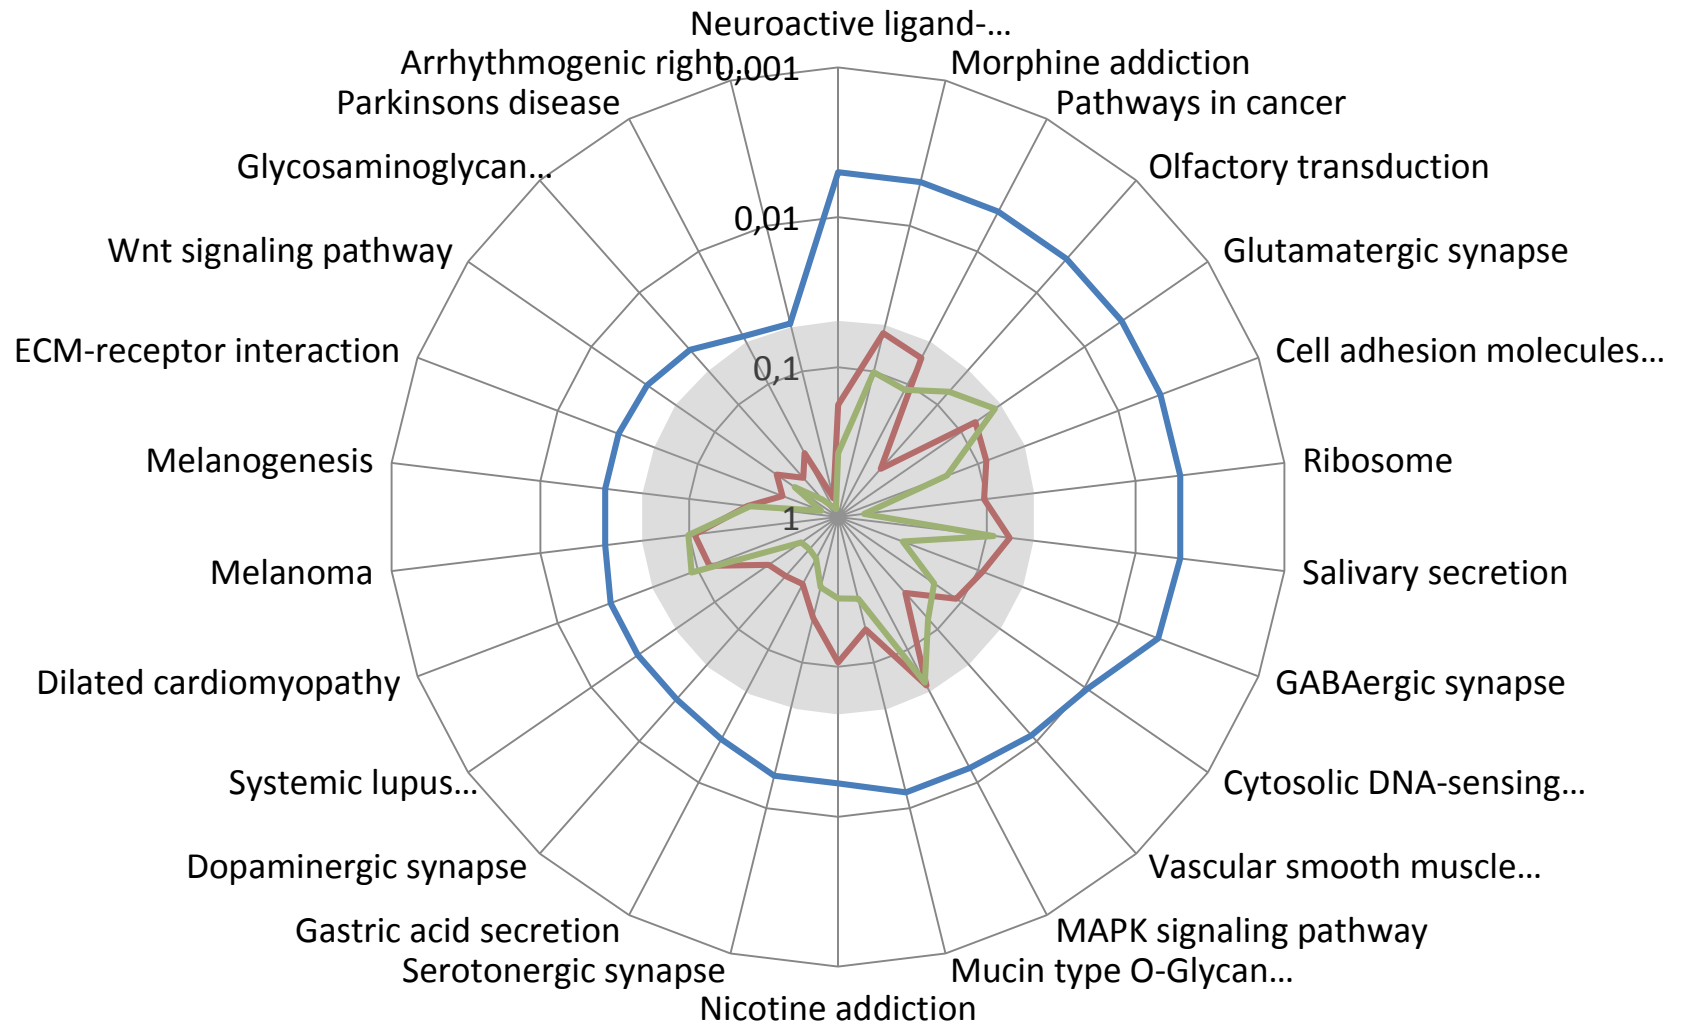

Supplement: 1471-2164-15-622-S3.pdf [file 1471-2164-15-622-S3.pdf]
